# Supplementary material for: Arl15 upregulates the TGFβ family signaling by promoting the assembly of the Smad-complex
Source: eLife. 2022 Jul 14;11:e76146. doi: 10.7554/eLife.76146 (PMC9352346; doi:10.7554/eLife.76146)
Supplement: Figure 1—source data 2. [file elife-76146-fig1-data2.xlsx]

## Sheet: Figure 1d
Figure 1d
	Relative amount of Arl15 IPed by Smad4
		GL2-shRNA
		Starvation	TGFβ1
	Experiment #1	1	2.1096
	Experiment #2	1	3.93833
	Experiment #3	1	4.60368
	Mean	1	3.55054
	SD	0	1.29147
	P value		0.0267642

## Sheet: Figure 1f
Figure 1f
	Relative amount of Arl15-AL-GFP pulled down
		GST-MH1	GST-MH2	GST-linker-MH2	GST-Smad4	GST
	Experiment #1	0.0024912	0.492905	0.951855	1	0
	Experiment #2	-0.000517502	0.462111	1.05161	1	0
	Experiment #3	0.00814646	0.741798	1.20797	1	0
	Mean	0.00337339	0.565605	1.07048	1	0
	SD	0.00439883	0.153363	0.129095	0	0
	p value			0.0120411
			`

## Sheet: Figure 1k
Figure 1k
	Relative amount of Smad4 mutant pulled down by GST-Arl15-AL
		GFP-Smad4 mutant
		M447K	D493H	L495P	R496H	R497H	A532D	E538K	H541Y	WT	WT (GST pull-down. negative control)
	Experiment #1	1.73833	1.44314	2.11837	1.57682	1.7263	0.158628	0.0958446	0.0710736	1	0
	Experiment #2	0.751209	0.814623	0.629535	0.768727	0.667332	0.238726	0.557961	0.798175	1	0
	Experiment #3	0.908424	0.368505	1.07402	0.840173	0.595704	0.218602	0.207332	0.276189	1	0
	Mean	1.13266	0.875424	1.27398	1.06191	0.996446	0.205318	0.287046	0.381813	1	0
	SD	0.530389	0.539894	0.764294	0.447359	0.633088	0.0416683	0.241151	0.374882	0	0
	p value	0.115811	0.263219	0.143672	0.11373	0.221469	0.46314	0.731356	1
