# Supplementary material for: Arl15 upregulates the TGFβ family signaling by promoting the assembly of the Smad-complex
Source: eLife. 2022 Jul 14;11:e76146. doi: 10.7554/eLife.76146 (PMC9352346; doi:10.7554/eLife.76146)
Supplement: Figure 2—source data 1. [file elife-76146-fig2-data1.xlsx]

## Sheet: Figure 2e
Figure 2e
	Fraction of colocalized red puncta per cell
	Co-expressed markers	Cell ID	Number of colocalizated red puncta	Number of all red puncta	Fraction of colocalized red puncta per cell	Mean	SD
	Lamp1-GFP and mCherry-Smad4-MH2	1	86	116	0.741379	0.764433	0.0502147
		2	108	157	0.687898
		3	72	92	0.782609
		4	253	205	0.810277
		5	110	88	0.8
	GFP-Rab7 and mCherry-Smad4-MH2	1	170	114	0.670588	0.727098	0.0970744
		2	74	52	0.702703
		3	59	37	0.627119
		4	157	138	0.878981
		5	123	93	0.756098
	TfR-GFP and mCherry-Smad4-MH2	1	92	4	0.0434783	0.0467108	0.0239085
		2	43	3	0.0697674
		3	107	4	0.0373832
		4	43	3	0.0697674
		5	76	1	0.0131579
	Arl15-AL-GFP and Lamp1-mCherry	1	244	75	0.307377	0.35576	0.143374
		2	297	104	0.350168
		3	320	122	0.38125
		4	146	83	0.568493
		5	344	59	0.171512
	Arl15-AL-GFP and mCherry-Smad4-MH2	1	66	38	0.575758	0.450849	0.0729622
		2	185	71	0.383784
		3	112	49	0.4375
		4	160	68	0.425
		5	118	51	0.432203
