# Supplementary material for: Arl15 upregulates the TGFβ family signaling by promoting the assembly of the Smad-complex
Source: eLife. 2022 Jul 14;11:e76146. doi: 10.7554/eLife.76146 (PMC9352346; doi:10.7554/eLife.76146)
Supplement: Figure 3—source data 2. [file elife-76146-fig3-data2.xlsx]

## Sheet: Figure 3c
Figure 3c
	Percentage of Flag-Smad1 pulled down (%)
		Without GFP-Smad4	With GFP-Smad4
	Experiment #1	0.0648927	0.559734
	Experiment #2	0.129975	0.53019
	Experiment #3	0.116176	0.478018
	Mean	0.103681	0.522647
	SD	0.0342929	0.0413772
	p value		0.000174059

## Sheet: Figure 3e
Figure 3e
	Relative Smad4 protein level in cell lysate
		Control siRNA	Smad4 siRNA
	Experiment #1	1	0.534273
	Experiment #2	1	0.337067
	Experiment #3	1	0.284707
	Mean	1	0.385349
	SD	0	0.131602
	p value		0.00126896

## Sheet: Figure 3f
Figure 3f
	Relative amount of phospho-Smad2/3 IPed by Arl15-AL-GFP
		Control siRNA	Smad4 siRNA
	Experiment #1	1	0.0913171
	Experiment #2	1	0.364252
	Experiment #3	1	0.0269783
	Mean	1	0.160849
	SD	0	0.179066
	p value		0.0012528
