# Supplementary material for: Arl15 upregulates the TGFβ family signaling by promoting the assembly of the Smad-complex
Source: eLife. 2022 Jul 14;11:e76146. doi: 10.7554/eLife.76146 (PMC9352346; doi:10.7554/eLife.76146)
Supplement: Figure 4—source data 2. [file elife-76146-fig4-data2.xlsx]

## Sheet: Figure 4b,d
Figure 4b										Figure 4d
	Normalized pull-down of HA-Smad4-MH2									Normalized pull-down of Myc-Smad2-MH2
		lane 1	lane 2	lane 3	lane 4	lane 5					lane 1	lane 2	lane 3	lane 4
	Experiment #1	0.588356	0	0	0.148979	0.697621				Experiment #1	0.515082	0.147521	1.04741	1.02831
	Experiment #2	1.43133	0	0	0.00913224	0.697281				Experiment #2	0.651161	0.222521	1.14807	0.747157
	Experiment #3	0.737179	0	0	0.00721917	0.446721				Experiment #3	1.19793	0.227497	1.09049	0.496454
	Mean	0.918954	0	0	0.0551101	0.613874				Mean	0.788057	0.19918	1.09532	0.757306
	SD	0.449924	0	0	0.0812983	0.144759				SD	0.361422	0.0448069	0.0505016	0.266071
	p value					0.00431476				p value			2.1208e-05

## Sheet: Figure 4h
Figure 4h
	Relative cellular phospho-Smad2/3
	shRNA	GL2-shRNA		Arl15-shRNA2
	Treatment	Starvation	TGFβ1	Starvation	TGFβ1
	Experiment #1	1	6.29691	0.174872	5.60954
	Experiment #2	1	12.6971	0	26.3854
	Experiment #3	1	23.8861	0.324783	6.59136
	Mean	1	14.2934	0.166552	12.8621
	SD	0	8.9026	0.162551	11.7218
	p value		0.874425

## Sheet: Figure 4i
Figure 4i
	Relative amount of phoshpo-Smad2/3 IPed by Smad4
	Treatment	TGFβ1
	shRNA	GL2-shRNA	Arl15-shRNA2
	Experiment #1	1	0.0996661
	Experiment #2	1	0.651963
	Experiment #3	1	0.601775
	Mean	1	0.451135
	SD	0	0.305413
	p value		0.0357781
