# Supplementary material for: Arl15 upregulates the TGFβ family signaling by promoting the assembly of the Smad-complex
Source: eLife. 2022 Jul 14;11:e76146. doi: 10.7554/eLife.76146 (PMC9352346; doi:10.7554/eLife.76146)
Supplement: Figure 5—source data 2. [file elife-76146-fig5-data2.xlsx]

## Sheet: Figure 5c-d
Figure 5c
	Percentage of nuclear phospho-Smad2/3
		TGF-β
		GL2-shRNA	Arl15-shRNA2
	Experiment #1	1.00763	0.177053
	Experiment #2	0.883937	0.437124
	Experiment #3	0.779532	0.247018
	Mean	0.890367	0.287065
	SD	0.114186	0.134581
	p value		0.00407669
Figure 5d
	Percentage of nuclear Samd4
		TGF-β
		GL2-shRNA	Arl15-shRNA2
	Experiment #1	0.793688	0.321189
	Experiment #2	0.996728	0.486754
	Experiment #3	0.95608	0.721088
	Mean	0.915499	0.509677
	SD	0.107431	0.200933
	p value		0.0367543

## Sheet: Figure 5e
Figure 5e	GAP assays-Absorbance at 360 nm
	Time (min)	His-Smad4 + Arl15-WT			His-Smad4 + His-Smad2-SE + Arl15-WT			His-Smad2-SE + His-Arl15-WT			Arl15-WT			His-Smad4 + Arl15-AL			His-Smad4 + His-Smad2-SE+Arl15-AL			His-Smad2-SE + His-Arl15-AL			Arl15-AL
		repeat 1	repeat 2	repeat 3	repeat 1	repeat 2	repeat 3	repeat 1	repeat 2	repeat 3	repeat 1	repeat 2	repeat 3	repeat 1	repeat 2	repeat 3	repeat 1	repeat 2	repeat 3	repeat 1	repeat 2	repeat 3	repeat 1	repeat 2	repeat 3
	0	0	0	0	0	0	0	0	0	0	0	0	0	0	0	0	0	0	0	0	0	0	0	0	0
	1	0.025	0.042	0.033	0.06	0.061	0.064	-0.006	0.009	0.007	0.001	0.001	0.004	0.003	0.001	0.002	0.002	0.002	0.002	0.001	0	0.002	0.004	0.002	0.002
	2	0.054	0.073	0.055	0.111	0.124	0.119	-0.003	0.011	0.01	0.003	0.007	0.005	0.005	0.003	0.004	0.003	0.005	0.007	0.003	0.001	0.004	0.004	0.002	0.003
	3	0.069	0.088	0.075	0.149	0.154	0.158	-0.002	0.012	0.012	0.004	0.008	0.005	0.007	0.005	0.007	0.004	0.006	0.004	0.004	0.003	0.006	0.007	0.006	0.007
	4	0.085	0.104	0.088	0.176	0.187	0.186	0.005	0.017	0.018	0.006	0.01	0.008	0.01	0.007	0.009	0.005	0.008	0.01	0.006	0.004	0.009	0.008	0.008	0.008
	5	0.092	0.107	0.094	0.189	0.197	0.193	0.006	0.018	0.019	0.008	0.014	0.012	0.012	0.008	0.011	0.006	0.008	0.008	0.007	0.005	0.01	0.01	0.01	0.01
	6	0.098	0.112	0.099	0.199	0.209	0.206	0.009	0.021	0.021	0.01	0.017	0.013	0.014	0.009	0.014	0.008	0.013	0.015	0.008	0.006	0.012	0.013	0.012	0.012
	7	0.104	0.115	0.106	0.213	0.218	0.215	0.011	0.022	0.022	0.012	0.02	0.021	0.016	0.011	0.016	0.009	0.013	0.017	0.01	0.007	0.014	0.016	0.015	0.016
	8	0.107	0.113	0.109	0.219	0.221	0.215	0.014	0.023	0.023	0.014	0.022	0.022	0.018	0.012	0.018	0.01	0.016	0.017	0.011	0.008	0.016	0.017	0.017	0.017
	9	0.112	0.118	0.116	0.229	0.226	0.224	0.016	0.025	0.025	0.016	0.024	0.027	0.021	0.013	0.02	0.011	0.015	0.013	0.012	0.01	0.018	0.019	0.018	0.018
	10	0.111	0.117	0.116	0.225	0.222	0.221	0.019	0.027	0.027	0.019	0.025	0.029	0.022	0.013	0.022	0.013	0.02	0.014	0.014	0.011	0.02	0.022	0.021	0.021
	Values used in the plot
	Time (min)	His-Smad4 + Arl15-WT		His-Smad4 + His-Smad2-SE + Arl15-WT		His-Smad2-SE + His-Arl15-WT		Arl15-WT		His-Smad4 + Arl15-AL		His-Smad4 + His-Smad2-SE + Arl15-AL		His-Smad2-SE + His-Arl15-AL		Arl15-AL
		Mean	SD	Mean	SD	Mean	SD	Mean	SD	Mean	SD	Mean	SD	Mean	SD	Mean	SD
	0	0	0	0	0	0	0	0	0	0	0	0	0	0	0	0	0
	1	0.0333333	0.0085049	0.0616667	0.00208167	0.00333333	0.00814453	0.002	0.00173205	0.002	0.001	0.002	0	0.001	0.001	0.00266667	0.0011547
	2	0.0606667	0.0106927	0.118	0.00655744	0.006	0.00781025	0.005	0.002	0.004	0.001	0.005	0.002	0.00266667	0.00152753	0.003	0.001
	3	0.0773333	0.00971253	0.153667	0.00450925	0.00733333	0.0080829	0.00566667	0.00208167	0.00633333	0.0011547	0.00466667	0.0011547	0.00433333	0.00152753	0.00666667	0.00057735
	4	0.0923333	0.0102144	0.183	0.00608276	0.0133333	0.00723418	0.008	0.002	0.00866667	0.00152753	0.00766667	0.00251661	0.00633333	0.00251661	0.008	1.60403e-17
	5	0.0976667	0.00814453	0.193	0.004	0.0143333	0.00723418	0.0113333	0.00305505	0.0103333	0.00208167	0.00733333	0.0011547	0.00733333	0.00251661	0.01	1.60403e-17
	6	0.103	0.00781025	0.204667	0.0051316	0.017	0.0069282	0.0133333	0.00351188	0.0123333	0.00288675	0.012	0.00360555	0.00866667	0.00305505	0.0123333	0.00057735
	7	0.108333	0.00585947	0.215333	0.00251661	0.0183333	0.00635085	0.0176667	0.00493288	0.0143333	0.00288675	0.013	0.004	0.0103333	0.00351188	0.0156667	0.00057735
	8	0.109667	0.00305505	0.218333	0.00305505	0.02	0.00519615	0.0193333	0.0046188	0.016	0.0034641	0.0143333	0.00378594	0.0116667	0.00404145	0.017	0
	9	0.115333	0.00305505	0.226333	0.00251661	0.022	0.00519615	0.0223333	0.00568624	0.018	0.0043589	0.013	0.002	0.0133333	0.00416333	0.0183333	0.00057735
	10	0.114667	0.00321455	0.222667	0.00208167	0.0243333	0.0046188	0.0243333	0.00503322	0.019	0.00519615	0.0156667	0.00378594	0.015	0.00458258	0.0213333	0.00057735
Fig. 5f	GAP assays-Absorbance at 360 nm
	Time (min)	GST-Smad4-MH2-linker + His-Arl15-WT			GST-Smad4-MH2 + His-Arl15-WT			GST-Smad4 + His-Arl15-WT			GST-Smad4-MH1 + His-Arl15-WT			GST + His-Arl15-WT
		repeat 1	repeat 2	repeat 3	repeat 1	repeat 2	repeat 3	repeat 1	repeat 2	repeat 3	repeat 1	repeat 2	repeat 3	repeat 1	repeat 2	repeat 3
	0	0	0	0	0	0	0	0	0	0	0	0	0	0	0	0
	1	0.033	0.043	0.032	0.036	0.029	0.03	0.028	0.032	0.031	0.002	0.009	0.004	0.002	0.001	-0.001
	2	0.062	0.071	0.064	0.062	0.051	0.055	0.053	0.058	0.054	0.005	0.011	0.006	0.006	0.002	0.002
	3	0.082	0.091	0.086	0.081	0.067	0.072	0.071	0.077	0.069	0.007	0.012	0.004	0.008	0.004	0.005
	4	0.096	0.102	0.099	0.091	0.077	0.081	0.082	0.088	0.078	0.009	0.014	0.009	0.009	0.006	0.008
	5	0.101	0.106	0.102	0.095	0.079	0.085	0.085	0.092	0.081	0.011	0.013	0.011	0.01	0.008	0.012
	6	0.108	0.112	0.108	0.1	0.085	0.089	0.092	0.097	0.088	0.014	0.016	0.011	0.012	0.009	0.016
	7	0.114	0.118	0.116	0.105	0.089	0.095	0.098	0.103	0.094	0.016	0.018	0.013	0.013	0.011	0.02
	8	0.121	0.124	0.123	0.112	0.096	0.103	0.105	0.109	0.102	0.018	0.021	0.015	0.016	0.013	0.023
	9	0.123	0.128	0.13	0.114	0.1	0.106	0.107	0.112	0.105	0.019	0.023	0.014	0.018	0.015	0.027
	10	0.123	0.128	0.129	0.113	0.1	0.108	0.106	0.111	0.105	0.02	0.025	0.016	0.021	0.017	0.03
	Values used in the plot
	Time (min)	GST-Smad4-MH2-linker + His-Arl15-WT		GST-Smad4-MH2 + His-Arl15-WT		GST-Smad4 + His-Arl15-WT		GST-Smad4-MH1 + His-Arl15-WT		GST + His-Arl15-WT
		Mean	SD	Mean	SD	Mean	SD	Mean	SD	Mean	SD
	0	0	0	0	0	0	0	0	0	0	0
	1	0.036	0.00608276	0.0316667	0.00378594	0.0303333	0.00208167	0.005	0.00360555	0.000666667	0.00152753
	2	0.0656667	0.00472582	0.056	0.00556776	0.055	0.00264575	0.00733333	0.00321455	0.00333333	0.0023094
	3	0.0863333	0.00450925	0.0733333	0.0070946	0.0723333	0.00416333	0.00766667	0.00404145	0.00566667	0.00208167
	4	0.099	0.003	0.083	0.0072111	0.0826667	0.00503322	0.0106667	0.00288675	0.00766667	0.00152753
	5	0.103	0.00264575	0.0863333	0.0080829	0.086	0.00556776	0.0116667	0.0011547	0.01	0.002
	6	0.109333	0.0023094	0.0913333	0.00776745	0.0923333	0.00450925	0.0136667	0.00251661	0.0123333	0.00351188
	7	0.116	0.002	0.0963333	0.0080829	0.0983333	0.00450925	0.0156667	0.00251661	0.0146667	0.00472582
	8	0.122667	0.00152753	0.103667	0.00802081	0.105333	0.00351188	0.018	0.003	0.0173333	0.0051316
	9	0.127	0.00360555	0.106667	0.00702377	0.108	0.00360555	0.0186667	0.00450925	0.02	0.006245
	10	0.126667	0.00321455	0.107	0.00655744	0.107333	0.00321455	0.0203333	0.00450925	0.0226667	0.00665833

## Sheet: Figure 5 h-i
Figure 5h
	Percentage of nuclear phospho-Smad2/3
		TGF-β1
		Arl15-AL	Empty vector
	Experiment #1	0.522535	0.857325
	Experiment #2	0.0879503	0.887215
	Experiment #3	0.114228	0.702977
	Mean	0.241571	0.815839
	SD	0.243677	0.0988773
	p value	0.0193962
Figure 5i
	Percentage of nuclear Smad4
		TGF-β1
		Arl15-AL	Empty vector
	Experiment #1	0.491247	0.936156
	Experiment #2	0.313363	0.866047
	Experiment #3	0.196119	0.573476
	Mean	0.333576	0.791893
	SD	0.148598	0.192375
	p value	0.0309156
