# Supplementary material for: Arl15 upregulates the TGFβ family signaling by promoting the assembly of the Smad-complex
Source: eLife. 2022 Jul 14;11:e76146. doi: 10.7554/eLife.76146 (PMC9352346; doi:10.7554/eLife.76146)
Supplement: Figure 6—figure supplement 1—source data 2. [file elife-76146-fig6-figsupp1-data2.xlsx]

## Sheet: Fig.6-figure supplement 1abdfhj
Figure 6 - figure supplement 1a							Figure 6 - figure supplement 1b
Luciferase reading							Luciferase reading
	Control	Arl15-AL	Arl15-AL+SB431542					Control	Arl15-WT	Arl15-AL	Arl15-TN
SBEx4-luc	8223	12229	7246				BRE-luc	7700	10876	9845	7245
	9423	15662	7411					8475	10534	9145	8260
	9025	13594	7019					7349	10310	9246	8017
Renila-luciferase	49251	38231	49308				Renila-luciferase	52556	38506	25413	49754
	59231	47334	46612					64247	39673	24657	53450
	55012	44288	45795					52002	43695	22036	54458
Relative luciferase activity of SBEx4-luc							Relative luciferase activity of BRE-luc
	Control	Arl15-AL	Arl15-AL+SB431542					Control	Arl15-WT	Arl15-AL	Arl15-TN
Relative luciferase activity	1	1.91584	0.880168				Relative luciferase activity	1	1.92785	2.64418	0.993898
	1	2.07986	0.999399					1	2.01285	2.81162	1.17151
	1	1.87099	0.934259					1	1.66962	2.96902	1.0417
Mean	1	1.95556	0.937942				Mean	1	1.87011	2.80827	1.06904
SD	0	0.109954	0.0597007				SD	0	0.178749	0.162444	0.0919066
							P value		0.00108374	2.86235e-06
Figure 6 - figure supplement 1d
Luciferase reading
	GL2-shRNA	GL2-shRNA +BMP2	Arl15-shRNA1	Arl15-shRNA1 +BMP2	Arl15-shRNA2	Arl15-shRNA2 + BMP2
BRE-luc	6235	42272	4245	20302	3315	22277
	5279	38343	4321	19380	3419	16384
	4133	45270	3244	18283	3287	23257
Renila-luciferase	15718	11994	15825	12662	15141	17724
	16376	11462	15614	13652	14313	14726
	12686	12163	11287	10906	13716	19995
Relative luciferase activity of BRE-luc
	GL2-shRNA	GL2-shRNA +BMP2	Arl15-shRNA1	Arl15-shRNA1 +BMP2	Arl15-shRNA2	Arl15-shRNA2 + BMP2
Relative luciferase activity	1	8.88484	0.676231	4.04201	0.551937	3.16852
	1	10.3772	0.858472	4.40366	0.741011	3.45137
	1	11.4243	0.882189	5.14566	0.735583	3.57019
Mean	1	10.2288	0.805631	4.53044	0.676177	3.39669
SD	0	1.27622	0.112689	0.562644	0.107629	0.206345
P value			0.0404385	0.00210461	0.00646622	0.000790706
Figure 6 - figure supplement 1f
Golgi fraction of ManII-SBP-GFP
chase time (min)	Arl15-shRNA1			Arl15-shRNA2			GL2-shRNA			Mon2 siRNA#2
	Mean	SEM	No. cell	Mean	SEM	No. cell	Mean	SEM	No. cell	Mean	SEM	No. cell
0	0.128945	0.0081643	30	0.125	0.00921	30	0.123281	0.0101393	31	0.138503	0.0264352	30
10	0.366209	0.0255361	31	0.353834	0.0343708	30	0.360944	0.031392	32	0.442819	0.0298215	35
20	0.395794	0.0320774	30	0.394182	0.026482	30	0.409923	0.0268629	31	0.470003	0.0278639	36
30	0.449441	0.0311917	35	0.445607	0.0258223	33	0.446327	0.0291706	32	0.498721	0.0234942	30
60	0.445361	0.0272731	33	0.450162	0.022764	35	0.439994	0.0307614	30	0.423593	0.0214769	31
Figure 6 - figure supplement 1h
Golgi fraction of TNFα-SBP-GFP
chase time (min)	Arl15-shRNA1			Arl15-shRNA2			GL2-shRNA			Mon2 siRNA#2
	Mean	SEM	No. cell	Mean	SEM	No. cell	Mean	SEM	No. cell	Mean	SEM	No. cell
0	0.425906	0.0297819	33	0.427985	0.0220584	33	0.442366	0.025257	34	0.435911	0.0310657	34
10	0.343418	0.0136419	30	0.353009	0.0253537	41	0.344461	0.027074	32	0.411778	0.0296931	38
20	0.318008	0.0180301	35	0.293815	0.0185429	36	0.293318	0.0219535	33	0.389107	0.0209977	33
30	0.2703	0.0200651	35	0.253506	0.0225967	35	0.263893	0.018923	35	0.356546	0.0229181	37
60	0.141982	0.0147286	34	0.131679	0.0175689	30	0.148268	0.0118264	35	0.189015	0.0192459	36
Figure 6 - figure supplement 1j
Raw data (normalized by corresponding β-tubulin) from 3 independent repeats
	E-cadherin			N-Cadherin			ID1			p21cip1			Snail1			p27kip1			c-Myc			Vimentin			Arl15
	Arl15-shRNA1	Arl15-shRNA2	GL2- shRNA	Arl15-shRNA1	Arl15-shRNA2	GL2- shRNA	Arl15-shRNA1	Arl15-shRNA2	GL2- shRNA	Arl15-shRNA1	Arl15-shRNA2	GL2- shRNA	Arl15-shRNA1	Arl15-shRNA2	GL2- shRNA	Arl15-shRNA1	Arl15-shRNA2	GL2- shRNA	Arl15-shRNA1	Arl15-shRNA2	GL2- shRNA	Arl15-shRNA1	Arl15-shRNA2	GL2- shRNA	Arl15-shRNA1	Arl15-shRNA2	GL2- shRNA
Raw	0.00024065	0.00033914	3.95242e-05	0.000460824	0.000624764	0.00228327	0.0344994	0.0228724	0.191665	0.0967594	0.0995383	0.263869	0.00070371	0.000878201	0.00435139	0.000405435	0.000301876	0.000758258	0.364762	0.4404	0.127171	0.000274086	8.10391e-05	0.000922679	0.00306773	0.00284098	0.00851683
	0.00029758	0.000220647	5.21834e-05	0.000803897	0.000581543	0.0013882	0.0283536	0.0251022	0.112795	0.0788647	0.075486	0.256807	0.000577315	0.000555812	0.00214788	0.000309542	0.000207428	0.000460477	0.229314	0.272237	0.121659	3.83871e-05	1.46424e-05	0.000139551	0.00239492	0.001928	0.00734874
	0.000137976	0.000279832	2.08325e-05	0.00140341	0.000844548	0.00185834	0.0532521	0.0220207	0.367273	0.127341	0.0591706	0.214034	0.000717837	0.000543742	0.00223012	9.47625e-05	8.50173e-05	0.000160552	0.204917	0.514798	0.131838	0.000916581	0.000179602	0.00188628	0.00235193	0.00174534	0.00661805
Normalized	6.08867	8.58057	1	0.201826	0.273626	1	0.179999	0.119335	1	0.366695	0.377226	1	0.161721	0.201821	1	0.534693	0.398118	1	2.86828	3.46306	1	0.297055	0.0878302	1	0.360196	0.333572	1
	5.70257	4.2283	1	0.579092	0.418918	1	0.251374	0.222548	1	0.307096	0.29394	1	0.268783	0.258772	1	0.67222	0.450463	1	1.88488	2.2377	1	0.275076	0.104925	1	0.325895	0.262358	1
	6.62309	13.4325	1	0.755198	0.454464	1	0.144993	0.0599572	1	0.594957	0.276454	1	0.321883	0.243817	1	0.590229	0.529531	1	1.55431	3.90478	1	0.48592	0.0952148	1	0.355381	0.263724	1
Values used in the plot
	E-cadherin			N-cadherin			ID1			p21cip1			Snail1			p27kip1			c-Myc			vimentin			Arl15
	Arl15-shRNA1	Arl15-shRNA2	GL2- shRNA	Arl15-shRNA1	Arl15-shRNA2	GL2- shRNA	Arl15-shRNA1	Arl15-shRNA2	GL2- shRNA	Arl15-shRNA1	Arl15-shRNA2	GL2- shRNA	Arl15-shRNA1	Arl15-shRNA2	GL2- shRNA	Arl15-shRNA1	Arl15-shRNA2	GL2- shRNA	Arl15-shRNA1	Arl15-shRNA2	GL2- shRNA	Arl15-shRNA1	Arl15-shRNA2	GL2- shRNA	Arl15-shRNA1	Arl15-shRNA2	GL2- shRNA
Mean	6.13811	8.74711	1	0.512039	0.382336	1	0.192122	0.133947	1	0.422916	0.315874	1	0.250796	0.234803	1	0.599047	0.459371	1	2.10249	3.20185	1	0.352683	0.0959901	1	0.347157	0.286551	1
SD	0.462246	4.60434	0	0.282714	0.0958083	0	0.0542165	0.0822742	0	0.151943	0.0538476	0	0.0815822	0.0295263	0	0.0691865	0.066158	0	0.683481	0.863694	0	0.115908	0.00857385	0	0.0185706	0.040727	0
P value	4.28961e-05	0.0434911		0.040358	0.000366135		1.3388e-05	5.32262e-05		0.00276417	2.5239e-05		9.13125e-05	1.47305e-06		0.000553884	0.000144652		0.0491164	0.0115504		0.000639105	5.39302e-09		4.35712e-07	7.02831e-06
