# Supplementary material for: Arl15 upregulates the TGFβ family signaling by promoting the assembly of the Smad-complex
Source: eLife. 2022 Jul 14;11:e76146. doi: 10.7554/eLife.76146 (PMC9352346; doi:10.7554/eLife.76146)
Supplement: Figure 6—source data 1. [file elife-76146-fig6-data1.xlsx]

## Sheet: Figure 6a-e
Figure 6a										Fig. 6b
Luciferase reading										Luciferase reading
	Starvation				TGFβ1						GL2-shRNA		Arl15-shRNA1		Arl15-shRNA2
	Control	Arl15-WT	Arl15-AL	Arl15-TN	Control						Starvation	TGFβ1	Starvation	TGFβ1	Starvation	TGFβ1
SBEx4-luc	5730	9502	11507	5102	67056					SBEx4-luc	5746	51270	4239	29299	3111	22146
	5409	9759	11798	4879	78042						4968	54545	4327	26378	2926	16472
	5933	9014	11051	5703	74098						4642	49269	3239	22291	2779	23306
Renilia-luciferase	13661	10126	9938	11848	6076					Renilia-luciferase	13753	12946	15713	12162	16129	14219
	12007	11435	9399	12109	6590						14341	10415	16389	13214	15325	13226
	13037	10921	9142	13256	7358						12677	9358	13399	10899	14701	16000
Relative luciferase activity										Relative luciferase activity
	Starvation				TGFβ1						GL2-shRNA		Arl15-shRNA1		Arl15-shRNA2
	Control	Arl15-WT	Arl15-AL	Arl15-TN	Control						Starvation	TGFβ1	Starvation	TGFβ1	Starvation	TGFβ1
Relative luciferase activity	0.419442	0.938376	1.15788	0.430621	11.0362					Relative luciferase activity	0.4178	3.9603	0.269777	2.40906	0.192882	1.55749
	0.450487	0.853432	1.25524	0.402923	11.8425						0.346419	5.23716	0.264019	1.99622	0.19093	1.24543
	0.455089	0.825382	1.20882	0.43022	10.0704						0.366175	5.26491	0.241734	2.04523	0.189035	1.45663
Relative luciferase activity										Relative luciferase activity
	Starvation				TGFβ1						GL2-shRNA		Arl15-shRNA1		Arl15-shRNA2
	Control	Arl15-WT	Arl15-AL	Arl15-TN	Control						Starvation	TGFβ1	Starvation	TGFβ1	Starvation	TGFβ1
Relative luciferase activity	0.949667	2.1246	2.62158	0.974978	24.9873					Relative luciferase activity	1.10882	10.5104	0.715971	6.39351	0.511899	4.1335
	1.01996	1.93227	2.84201	0.912267	26.8128						0.919377	13.8991	0.70069	5.29784	0.506717	3.30529
	1.03038	1.86876	2.7369	0.97407	22.8006						0.971807	13.9728	0.641549	5.42793	0.501687	3.8658
Relavtive luciferase activity of SBEx4-luc										Relavtive luciferase activity of SBEx4-luc (normalized)
	Starvation				TGFβ1						GL2-shRNA		Arl15-shRNA1		Arl15-shRNA2
	Control	Arl15-WT	Arl15-AL	Arl15-TN	Control						Starvation	TGFβ1	Starvation	TGFβ1	Starvation	TGFβ1
Mean	1	1.97521	2.7335	0.953771	24.8669					mean	1	12.7941	0.68607	5.70643	0.506768	3.76819
SD	0.0438999	0.133211	0.110258	0.035947	2.00882					SD	0.0978159	1.97808	0.0393061	0.598574	0.00510588	0.422644
P value		0.000272602	1.44931e-05	0.231024						P value			0.0067074	0.00402782	0.000951855	0.0015091
Fig. 6c
Raw data (normalized by corresponding β-tubulin) from 3 independent repeats
	E-cadherin			N-cadherin			c-Myc			ID1			Snail1			p27kip1			p21cip1			Arl15
	Arl15-AL	Arl15-TN	empty vector	Arl15-AL	Arl15-TN	empty vector	Arl15-AL	Arl15-TN	empty vector	Arl15-AL	Arl15-TN	empty vector	Arl15-AL	Arl15-TN	empty vector	Arl15-AL	Arl15-TN	empty vector	Arl15-AL	Arl15-TN	empty vector	Arl15-AL	Arl15-TN	empty vector
Raw	0.000459244	0.0020247	0.00180999	0.000422155	0.000131807	0.000103154	0.222485	0.559256	0.421248	0.0577417	0.0171097	0.0200043	0.000732187	0.00026004	0.000289427	6.29803e-05	1.37534e-05	2.28366e-05	0.221151	0.0799668	0.100347	0.0821914	0.117679	0.0152971
	0.000642375	0.00169011	0.00209065	0.000257338	0.000102729	0.00010299	0.200173	0.463771	0.443238	0.0437308	0.013203	0.0204373	0.000721813	0.000415934	0.000384701	6.04557e-05	2.29447e-05	1.76863e-05	0.283394	0.0988974	0.0886791	0.101092	0.170386	0.0190368
	0.000420833	0.00135492	0.00143779	0.000397941	0.000191563	0.000186562	0.00763251	0.0336719	0.0325795	0.10265	0.0131225	0.025983	0.0017715	0.000745436	0.00102192	8.44193e-05	3.09586e-05	3.18902e-05	0.318849	0.0664179	0.0646357	0.152398	0.214618	0.0290828
Normalized	0.253728	1.11862	1	4.09247	1.27777	1	0.528157	1.32762	1	2.88647	0.855302	1	2.52978	0.898464	1	2.75787	0.602255	1	2.20386	0.796903	1	5.37301	7.6929	1
	0.307261	0.808416	1	2.49868	0.997465	1	0.451615	1.04632	1	2.13975	0.646021	1	1.8763	1.08119	1	3.41822	1.29731	1	3.19572	1.11523	1	5.31033	8.95038	1
	0.292694	0.94236	1	2.13303	1.02681	1	0.234273	1.03353	1	3.95067	0.505044	1	1.73349	0.729444	1	2.64719	0.970788	1	4.93301	1.02757	1	5.24016	7.37957	1
Normalized expression level by RT-qPCR
	E-cadherin			N-cadherin			c-Myc			ID1			Snail1			p27kip1			p21cip1			Arl15
	Arl15-AL	Arl15-TN	empty vector	Arl15-AL	Arl15-TN	empty vector	Arl15-AL	Arl15-TN	empty vector	Arl15-AL	Arl15-TN	empty vector	Arl15-AL	Arl15-TN	empty vector	Arl15-AL	Arl15-TN	empty vector	Arl15-AL	Arl15-TN	empty vector	Arl15-AL	Arl15-TN	empty vector
Mean	0.284561	0.956467	1	2.90806	1.10068	1	0.404682	1.13582	1	2.99229	0.668789	1	2.04652	0.903032	1	2.94109	0.956786	1	3.4442	0.979901	1	5.30783	8.00761	1
SD	0.027678	0.155584	0	1.0419	0.154061	0	0.15246	0.166221	0	0.910086	0.176235	0	0.42456	0.175916	0	0.416896	0.347741	0	1.38143	0.16443	0	0.0664608	0.831354	0
P value	1.48837e-06	0.653278		0.0337943	0.320935		0.00249314	0.229899		0.019241	0.568786		0.012956	0.393775		0.00128404	0.840106		0.0374917	0.842679		3.77491e-08	0.000128029
Fig. 6d
Quantification of Arl15, fibronectin, and a-SMA transcripts under Arl15-AL or TN overexpression.
Gene	Arl15			a-SMA			Fibronectin
	Arl15-AL	Arl15-TN	Empty vector	Arl15-AL	Arl15-TN	Empty vector	Arl15-AL	Arl15-TN	Empty vector
Experiment #1	8.12632	10.8242	1	1.83424	1.11254	1	1.92117	1.21227	1
Experiment #2	4.77096	3.29773	1	1.33348	0.971721	1	1.85509	1.19973	1
Experiment #3	7.51498	4.1547	1	2.33677	1.08213	1	2.20613	0.721315	1
Mean	6.80409	6.09222	1	1.83483	1.05546	1	1.99413	1.04444	1
SD	1.78707	4.12039	0	0.501642	0.0741008	0	0.186547	0.279903	0
P value	0.00491102	0.099024		0.0449017	0.264559		0.000765693	0.796947
Fig. 6e
Raw data (normalized by corresponding ribosomal protein L13A mRNA) from 3 independent repeats
	E-cadherin			N-Cadherin			ID1			p21cip1			Snail1			p27kip1			C-Myc			Arl15
	Arl15-shRNA1	Arl15-shRNA2	GL2- shRNA	Arl15-shRNA1	Arl15-shRNA2	GL2- shRNA	Arl15-shRNA1	Arl15-shRNA2	GL2- shRNA	Arl15-shRNA1	Arl15-shRNA2	GL2- shRNA	Arl15-shRNA1	Arl15-shRNA2	GL2- shRNA	Arl15-shRNA1	Arl15-shRNA2	GL2- shRNA	Arl15-shRNA1	Arl15-shRNA2	GL2- shRNA	Arl15-shRNA1	Arl15-shRNA2	GL2- shRNA
Raw	2.40244	2.29172	1.00672	0.172739	0.0463085	0.290638	0.0109082	0.00690403	0.0179196	0.291605	0.57594	0.863338	0.000409604	0.000288406	0.00190734	0.0676726	0.0553765	0.119196	0.00816067	0.0179685	0.00496517	0.0224975	0.01722	0.0587973
	2.54355	2.17978	0.678013	0.113126	0.0702899	0.567898	0.0107051	0.00734497	0.0241844	0.296424	0.313199	1.26303	0.000332145	0.000240747	0.00147664	0.0507493	0.0363366	0.13011	0.00796664	0.0110121	0.00365181	0.0170917	0.0110084	0.0416321
	3.06222	2.07921	0.6647	0.16237	0.0448962	0.444589	0.00883389	0.00508117	0.0193306	0.312739	0.570818	1.76983	0.000429832	0.000336742	0.00126265	0.0694626	0.052035	0.165736	0.00830906	0.0151945	0.003471	0.0237098	0.01897	0.0502066
Normalized	2.38641	2.27642	1	0.594345	0.159334	1	0.60873	0.385277	1	0.337764	0.667108	1	0.214751	0.151208	1	0.567743	0.464584	1	1.64358	3.61891	1	0.382628	0.29287	1
	3.75147	3.21496	1	0.199201	0.123772	1	0.442646	0.303707	1	0.234693	0.247975	1	0.224933	0.163037	1	0.390049	0.279276	1	2.18156	3.01551	1	0.410542	0.264422	1
	4.60692	3.12804	1	0.365214	0.100984	1	0.456991	0.262857	1	0.176706	0.322528	1	0.34042	0.266694	1	0.419116	0.313963	1	2.39385	4.37755	1	0.472245	0.377838	1
Normalized expression level by RT-qPCR
	E-cadherin			N-cadherin			ID1			p21cip1			Snail1			p27kip1			c-Myc			Arl15
	Arl15-shRNA1	Arl15-shRNA2	GL2- shRNA	Arl15-shRNA1	Arl15-shRNA2	GL2- shRNA	Arl15-shRNA1	Arl15-shRNA2	GL2- shRNA	Arl15-shRNA1	Arl15-shRNA2	GL2- shRNA	Arl15-shRNA1	Arl15-shRNA2	GL2- shRNA	Arl15-shRNA1	Arl15-shRNA2	GL2- shRNA	Arl15-shRNA1	Arl15-shRNA2	GL2- shRNA	Arl15-shRNA1	Arl15-shRNA2	GL2- shRNA
Mean	3.5816	2.87314	1	0.386253	0.12803	1	0.502789	0.31728	1	0.249721	0.412537	1	0.260035	0.193647	1	0.458969	0.352608	1	2.073	3.67065	1	0.421805	0.31171	1
SD	1.11996	0.518597	0	0.19841	0.0294073	0	0.0920273	0.0623289	0	0.0815739	0.223594	0	0.069802	0.0635372	0	0.0953151	0.098513	0	0.386735	0.682491	0	0.0458579	0.0590088	0
P value	0.0162309	0.00332942		0.005855	8.60254e-07		0.000726196	4.54668e-05		9.07612e-05	0.0104119		5.17601e-05	2.53485e-05		0.000600196	0.000339774		0.00861304	0.00247336		2.60149e-05	3.54349e-05
