# Supplementary material for: Arl15 upregulates the TGFβ family signaling by promoting the assembly of the Smad-complex
Source: eLife. 2022 Jul 14;11:e76146. doi: 10.7554/eLife.76146 (PMC9352346; doi:10.7554/eLife.76146)
Supplement: Figure 7—source data 2. [file elife-76146-fig7-data2.xlsx]

## Sheet: Figure 7b, d, f
Figure 7b
Width of the wound gap (arbitrary unit)
	GL2-shRNA			Arl15-shRNA1			Arl15-shRNA2
Time (h)	1st exp.	2nd exp.	3rd exp.	1st exp.	2nd exp.	3rd exp.	1st exp.	2nd exp.	3rd exp.
0	0.347	0.321	0.311	0.318	0.337	0.346	0.351	0.329	0.326
8	0.228	0.214	0.211	0.232	0.28	0.269	0.277	0.234	0.28
16	0.125	0.167	0.148	0.186	0.236	0.23	0.236	0.238	0.235
24	0	0	0	0.114	0.088	0.115	0.134	0.137	0.128
Relative migration (%)
	GL2-shRNA			Arl15-shRNA1			Arl15-shRNA2
Time (h)	1st exp.	2nd exp.	3rd exp.	1st exp.	2nd exp.	3rd exp.	1st exp.	2nd exp.	3rd exp.
0	0	0	0	0	0	0	0	0	0
8	34.2939	33.3333	32.1543	27.044	16.9139	22.2543	21.0826	28.8754	14.1104
16	63.9769	47.9751	52.4116	41.5094	29.9703	33.526	32.7635	27.6596	27.9141
24	100	100	100	64.1509	73.8872	66.763	61.8234	58.3587	60.7362
Relavtive migration (%)
	GL2-shRNA				Arl15-shRNA1				Arl15-shRNA2
Time (h)	0	8	16	24	0	8	16	24	0	8	16	24
Mean	0	33.2605	54.7879	100	0	22.0708	35.0019	68.2671	0	21.3561	29.4457	60.3061
SD	0	1.07166	8.26136	0	0	5.06753	5.90944	5.0394	0	7.38627	2.87611	1.77195
P value						0.0506218	0.0237637	0.000280438		0.0432566	0.00181083	9.37121e-07
Figure 7d
The number of cells in each image field
	Arl15-shRNA1	Arl15-shRNA2	GL2-shRNA
1st exp. (5 image fields)	310	270	684
	351	202	731
	341	221	642
	325	218	671
	328	257	751
2nd exp. (5 image fields)	293	237	703
	265	197	751
	277	183	782
	289	251	737
	281	219	761
3rd exp. (5 image fields)	272	171	602
	303	199	780
	292	176	812
	288	182	721
	331	217	682
Relative invasion (%)
	Arl15-shRNA1	Arl15-shRNA2	GL2-shRNA
1st exp.	47.5711	33.5729	100
2nd exp.	37.6272	29.1109	100
3rd exp.	41.3122	26.2719	100
Mean	42.1702	29.6519	100
SD	5.02718	3.68043	0
P value	3.74405e-05	4.96428e-06
Figure 7f
Luciferase reading
	Arl15-AL-Myc
	D58N	E82K	R90L	R95C	Y96F	R150H	-
SBEx4-luc	6178	5136	5305	7223	5173	6311	5209
	5177	4163	7310	6356	4446	5467	6251
	6197	5248	6249	5260	4301	5253	7196
Renila-luciferase	5244	4669	9115	18520	7897	5160	4490
	5426	5203	10152	14955	8517	4737	6976
	7026	6174	10244	11688	7777	4388	7622
Relavtive luciferase activity of SBEx4-luc (normalized)
	Arl15-AL-Myc
	D58N	E82K	R90L	R95C	Y96F	R150H	-
Relative luciferase activity	101.549	94.8185	50.1673	33.6177	56.4641	105.424	100
	106.477	89.2914	80.3568	47.4301	58.2559	128.796	100
	93.4224	90.0337	64.6128	47.6676	58.5781	126.8	100
Relavtive luciferase activity of SBEx4-luc (normalized)
	Arl15-AL-Myc
	D58N	E82K	R90L	R95C	Y96F	R150H	-
Mean	100.483	91.3812	65.0456	42.9052	57.766	120.34	100
SD	6.59225	2.99985	15.0994	8.04402	1.13895	12.956	0
P value			0.0160018	0.000251475	3.52033e-07
