# Supplementary material for: Arl15 upregulates the TGFβ family signaling by promoting the assembly of the Smad-complex
Source: eLife journal article supplement (doi:10.7554/elife.76146), 2022-07-14

Figure 6 - source data 1

Figure 6-  
figure supplement1c

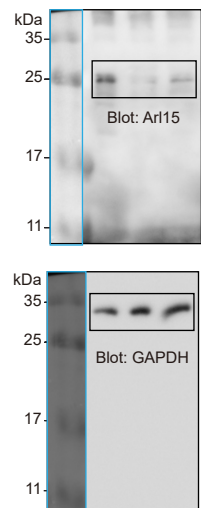

Figure 6-  
figure supplement1i

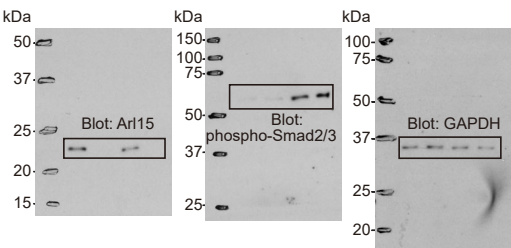

Figure 6-  
figure supplement1k

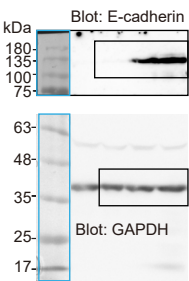

Supplement: supp [file elife-76146-supp-v1.zip]
