# Supplementary material for: Arl15 upregulates the TGFβ family signaling by promoting the assembly of the Smad-complex
Source: eLife. 2022 Jul 14;11:e76146. doi: 10.7554/eLife.76146 (PMC9352346; doi:10.7554/eLife.76146)
Supplement: Supplementary file 1. [file elife-76146-supp1.xlsx]

## Sheet: DNA plasmids
Supplementary Table 1 DNA plasmids
vectors
name	vector (source)	cloning sites	primers	brief method or source reference
pBluescript SK	Agilent Technologies
pEGFP-C1x				It was described in Mahajan et al., 2019.
pMyc-C1x				It was described in Mahajan et al., 2019.
pET30ax				It was described in Mahajan et al., 2019.
pGEB				It was decribed in Mahajan et al., 2013.
pMyc-N1				It was described in Madugula et al., 2016.
pLKO.1				Addgene # 10878; a gift from D. Root.
pDMyc-neo				It was decribed in Mahajan et al., 2013.
pDHA-neo				It was described in Shi et al., 2018.
pMyc-C1				It was described in Shi et al., 2018.
Constructs for Arl15
name	vector (source)	cloning sites	primers	brief method or source reference
Arl15-WT-GFP	pEGFP-N1 (Clontech)	EcoRI/BamHI	5'-GTC TAG GAA TTC GCC ACC ATG TCT GAT CTC CGG ATA ACT GAG-3', 5'-CA CTA CGG ATC CCC CAT TCT TAC AGC TTC ATG GTC TTT TTC-3'	The coding sequence (CDS) of Arl15 was PCR-amplified using human IMAGE clone 4699068 as the template and the resulting PCR fragment was digested by EcoRI/BamHI and ligated into pEGFP-N1 vector using the same sites.
Arl15-AL-GFP	pEGFP-N1 (Clontech)	EcoRI/BamHI	5'-GTC TAG GAA TTC GCC ACC ATG TCT GAT CTC CGG ATA ACT GAG-3', 5'-GTT ATC AAG CCC TCC AAG TTC-3', 5'-GAA CTT GGA GGG CTT GAT AAC-3', 5'-CA CTA CGG ATC CCC CAT TCT TAC AGC TTC ATG GTC TTT TTC-3'	Two PCR amplifications were performed using human IMAGE clone 4699068 as the template and the first/second and third/fourth primer pair, respectively. The two PCR fragments were subsequently mixed and subjected to the second round of PCR amplification using the first/fourth primer pair. The resulting PCR product was digested by EcoRI/BamHI and ligated into pEGFP-N1 using the same sites. This cons…
Arl15-TN-GFP	pEGFP-N1 (Clontech)	EcoRI/BamHI	5'-GTC TAG GAA TTC GCC ACC ATG TCT GAT CTC CGG ATA ACT GAG-3', 5'-CAA CAG ACT GTT TTT GCC AG-3', 5'-CT GGC AAA AAC AGT CTG TTG-3', 5'-CA CTA CGG ATC CCC CAT TCT TAC AGC TTC ATG GTC TTT TTC-3'	Two PCR amplifications were performed using human IMAGE clone 4699068 as the template and the first/second and third/fourth primer pair, respectively. The two PCR fragments were subsequently mixed and subjected to the second round of PCR amplification using the first/fourth primer pair. The resulting PCR product was digested by EcoRI/BamHI and ligated into pEGFP-N1 using the same sites. This cons…
Arl15-WT	pCI-neo (Promega)	EcoRI/NotI	5'-GTCACT GAATTC ATGTCTGATCTCCGAATAACT-3', 5'-GTCACT GCGGCCGC TCA CAT TCT TAC AGC TTC ATG-3'	The CDS of Arl15-wt was PCR-amplified using Arl15-wt-GFP as the template. The resulting PCR fragment was subsequently digested by EcoRI/NotI and ligated into pCI-neo vector using the same sites.
Arl15-AL	pCI-neo (Promega)	EcoRI/NotI	5'-GTCACT GAATTC ATGTCTGATCTCCGAATAACT-3', 5'-GTCACT GCGGCCGC TCA CAT TCT TAC AGC TTC ATG-3'	The CDS of Arl15-AL was PCR-amplified using Arl15-AL-GFP as the template. The resulting PCR fragment was subsequently digested by EcoRI/NotI and ligated into pCI-neo vector using the same sites.
Arl15-TN	pCI-neo (Promega)	EcoRI/NotI	5'-GTCACT GAATTC ATGTCTGATCTCCGAATAACT-3', 5'-GTCACT GCGGCCGC TCA CAT TCT TAC AGC TTC ATG-3'	The CDS of Arl15-TN was PCR-amplified using Arl15-TN-GFP as the template. The resulting PCR fragment was subsequently digested by EcoRI/NotI and ligated into pCI-neo vector using the same sites.
GST-Arl15-AL	pGEB	EcoRI/BamHI		The CDS of Arl15-AL was released by digesting Arl15-AL-GFP using EcoRI/BamHI. The resulting fragment was subsequently ligated into pGEB vector using the same sites.
GST-Arl15-TN	pGEB	EcoRI/BamHI		The CDS of Arl15-TN was released by digesting Arl15-TN-GFP using EcoRI/BamHI. The resulting fragment was ligated into pGEB vector using the same sites.
His-Arl15-WT	pET30ax	EcoRI/BamHI		The CDS of Arl15-wt was released by digesting GST-Arl15-wt using EcoRI/BamHI. The resulting fragment was subsequently ligated into pET30ax vector using the same sites.
His-Arl15-AL	pET30ax	EcoRI/BamHI		The CDS of Arl15-AL was released by digesting GST-Arl15-AL using EcoRI/BamHI. The resulting fragment was subsequently ligated into pET30ax vector using the same sites.
His-Arl15-TN	pET30ax	EcoRI/BamHI		The CDS of Arl15-TN was released by digesting GST-Arl15-TN using EcoRI/BamHI. The resulting fragment was subsequently ligated into pET30ax vector using the same sites.
Arl15-AL-Myc	pMyc-N1	EcoRI/BamHI		The CDS of Arl15-AL was released by digesting Arl15-AL-GFP using EcoRI/BamHI. The resulting fragment was subsequently ligated into pMyc-N1 vector using the same sites.
Arl15-TN-Myc	pMyc-N1	EcoRI/BamHI		The CDS of Arl15-TN was released by digesting Arl15-TN-GFP using EcoRI/BamHI. The resulting fragment was subsequently ligated into pMyc-N1 vector using the same sites.
Arl15-AL-sw2-GFP	pEGFP-N1 (Clontech)	EcoRI/BamHI	5'-GTC ACT GAA TTC A ATG TCT GAT CTC CGA ATA ACT G-3', 5'-TGT GTT CCA GGA TGA CCG GAT AGA ATC AAG CCC TCC AAG TTC TTT-3', 5'-TCT ATC CGG TCA TCC TGG AAC ACA TAC TAC CAA GGA TCT CAA GGG-3', 5'-GTC ACT GGA TCC TCA CAT TCT TAC AGC TTC ATG G-3'	Two PCR amplifications were performed using Arl15-AL-Myc as the template and the first/second and third/fourth primer pair, respectively. The two PCR fragments were subsequently mixed and subjected to the second round of PCR amplification using the first/fourth primer pair. The resulting PCR product was digested by EcoRI/BamHI and ligated into pEGFP-N1 vector using the same sites.
Arl15-shRNA1	pLKO.1	EcoRI/AgeI	5'-CCG GAA GCT GCT AGA AAT GAG CTG CCT CGA GGC AGC TCA TTT CTA GCA GCT TTT TTT G-3', 5'-AAT TCA AAA AAA GCT GCT AGA AAT GAG CTG CCT CGA GGC AGC TCA TTT CTA GCA GCT T-3'	Two oligonucleotides were annealed and ligated into EcoRI/AgeI digested pLKO.1 vector.
Arl15-shRNA2	pLKO.1	EcoRI/AgeI	5'-CCG GAA GAC AGC TTC TCT CAG CTG ACT CGA GTC AGC TGA GAG AAG CTG TCT TTT TTT G-3', 5'-AAT TCA AAA AAA GAC AGC TTC TCT CAG CTG ACT CGA GTC AGC TGA GAG AAG CTG TCT T-3'	Two oligonucleotides were annealed and ligated into EcoRI/AgeI digested pLKO.1 vector.
Arl15-AL-D58N-Myc	pMyc-N1	EcoRI/XmaI	5'-GAC AGC GAA TTC GCC ACC ATG TCT GAT CTC CGG ATA AC-3', 5'-C TGT GGT CGA CAC GAC GTT ATT GGG GCT TTC ACT GCA GAG-3', 5'-CTC TGC AGT GAA AGC CCC AAT AAC GTC GTG TCG ACC ACAG-3', 5'-GAC AGC CCC GGG TTA CAG ATC CTC TTC TGA GAT G-3'	Two PCR amplifications were performed using Arl15-AL-Myc as the template and the first/second and third/fourth primer pair, respectively. The two PCR fragments were subsequently mixed and subjected to the second round of PCR amplification using the first/fourth primer pair. The resulting PCR product was digested by EcoRI/XmaI and ligated into pMyc-N1 vector using the same sites. This construct co…
Arl15-AL-E82K-Myc	pMyc-N1	EcoRI/XmaI	5'-GAC AGC GAA TTC GCC ACC ATG TCT GAT CTC CGG ATA AC-3', 5'-GTT ATC AAG CCC TCC AAG CTT TTT TAC ATT CAA GAT GGC-3', 5'-GCC ATC TTG AAT GTA AAA AAG CTT GGA GGG CTT GAT AAC-3', 5'-GAC AGC CCC GGG TTA CAG ATC CTC TTC TGA GAT G-3'	Two PCR amplifications were performed by using Arl15-AL-Myc as the template and the first/second and third/fourth primer pair, respectively. The two PCR fragments were subseuqnelty mixed and subjected to the second round of PCR amplification using the first/fourth primer pair. The resulting PCR product was digested by EcoRI/XmaI and ligated into pMyc-N1 vector using the same sites. This construct…
Arl15-AL-R90L-Myc	pMyc-N1	EcoRI/XmaI	5'-GAC AGC GAA TTC GCC ACC ATG TCT GAT CTC CGG ATA AC-3', 5'-GTA GCG GCT CCA GTA TTT GAG GAT GTT ATC AAG CCC TCC-3', 5'-GGA GGG CTT GAT AAC ATC CTC AAA TAC TGG AGC CGC TAC-3', 5'-GAC AGC CCC GGG TTA CAG ATC CTC TTC TGA GAT G-3'	Two PCR amplifications were performed using Arl15-AL-Myc as the template and the first/second and third/fourth primer pair, respectively. The two PCR fragments were subseuqently mixed and subjected to the second round of PCR amplification using the first/fourth primer pair. The resulting PCR product was digested by EcoRI/XmaI and ligated into pMyc-N1 vector using the same sites. This construct co…
Arl15-AL-R95C-Myc	pMyc-N1	EcoRI/XmaI	5'-GAC AGC GAA TTC GCC ACC ATG TCT GAT CTC CGG ATA AC-3', 5'-C TTG AGA TCC TTG GTA GTA ACA GCT CCA GTA TTT CCG GAT-3', 5'-ATC CGG AAA TAC TGG AGC TGT TAC TAC CAA GGA TCT CAA G-3', 5'-GAC AGC CCC GGG TTA CAG ATC CTC TTC TGA GAT G-3'	Two PCR amplifications were performed using Arl15-AL-Myc as the template and the first/second and third/fourth primer pair, respectively. The two PCR fragments were subseuqenlty mixed and subjected to the second round of PCR amplification using the first/fourth primer pair. The resulting PCR product was digested by EcoRI/XmaI and ligated into pMyc-N1 vector using the same sites. This construct co…
Arl15-AL-Y96F-Myc	pMyc-N1	EcoRI/XmaI	5'-GAC AGC GAA TTC GCC ACC ATG TCT GAT CTC CGG ATA AC-3', 5'-CCC TTG AGA TCC TTG GTA AAA GCG GCT CCA GTA TTT CCG-3', 5'-CGG AAA TAC TGG AGC CGC TTT TAC CAA GGA TCT CAA GGG-3', 5'-GAC AGC CCC GGG TTA CAG ATC CTC TTC TGA GAT G-3'	Two PCR amplifications were performed using Arl15-AL-Myc as the template and the first/second and third/fourth primer pair, respectively. The two PCR fragments were subsequently mixed and subjected to the second round of PCR amplification using the first/fourth primer pair. The resulting PCR product was digested by EcoRI/XmaI and ligated into pMyc-N1 vector using the same sites. This construct co…
Arl15-AL-R150H-Myc	pMyc-N1	EcoRI/XmaI	5'-GAC AGC GAA TTC GCC ACC ATG TCT GAT CTC CGG ATA AC-3', 5'-TTT GAT CTC TTG TAC TGA ATG AGC TGC TGG CTT GTC TTG-3', 5'-CAA GAC AAG CCA GCA GCT CAT TCA GTA CAA GAG ATC AAA-3', 5'-GAC AGC CCC GGG TTA CAG ATC CTC TTC TGA GAT G-3'	Two PCR amplifications were performed using Arl15-AL-Myc as the template and the first/second and third/fourth primer pair, respectively. The two PCR fragments were subseuqenlty mixed and subjected to the second round of PCR amplification using the first/fourth primer pair. The resulting PCR product was digested by EcoRI/XmaI and ligated into pMyc-N1 vector using the same sites. This construct co…
Constructs for Smads
name	vector (source)	cloning sites	primers	brief method or source reference
GFP-Smad4	pEGFP-C1 (Clontech)	EcoRI/BamHI	5'- AGC TCT GAA TTC TAT GGA CAA TAT GTC TAT TAC G -3' and 5'- AGC TCT GGA TCC TCA GTC TAA AGG TTG TGG G -3'	The CDS of human Smad4 was PCR-amplified using IMAGE clone 2961238 (GenBank Accession No: BC002379.2) as the template. The resulting PCR product was subsequently digested by EcoRI/BamHI and ligated into pEGFP-C1 vector using the same sites.
GST-Smad4	pGEB	EcoRI/BamHI	5'-GTC ACT GAA TTC ATG GAC AAT ATG TCT ATT ACG-3', 5'-GTC ACT GGA TCC TCA GTC TAA AGG TTG TGG G-3'	The CDS of Smad4 was PCR-amplified using IMAGE clone 2961238 (GenBank Accession No: BC002379.2) as the template. The resulting PCR product was subsequently digested by EcoRI/BamHI and ligated into pGEB vector using the same sites.
GST-Smad4-MH1	pGEB	EcoRI/BamHI	5'-GTC ACT GAA TTC ATG GAC AAT ATG TCT ATT ACG-3', 5'-GTC ACT GGA TCC TTA GTG ATA CAA CTC GTT CGT AG-3'	The CDS of MH1 domain (1-138aa) of Smad4 was PCR-amplified using IMAGE clone 2961238 (GenBank Accession No: BC002379.2) as the template. The resulting PCR product was subsequently digested by EcoRI/BamHI and ligated into pGEB vector using the same sites.
GST-Smad4-Linker	pGEB	EcoRI/BamHI	5'-GTC ACT GAA TTC CTG GAA TTG ATC TCT CAG G-3', 5'-GTC ACT GGA TCC TTA CAG GAG CAG GAT GAT TGG-3'	The CDS of the linker region (140-320aa) of Smad4 was PCR-amplified using IMAGE clone 2961238 (GenBank Accession No: BC002379.2) as the template. The resulting PCR product was subseuqnelty digested by EcoRI/BamHI and ligated into pGEB vector using the same sites.
GST-Smad4-MH2	pGEB	EcoRI/BamHI	5'-GTC ACT GAA TTC AGT ATT GGT GTT CCA TTG C-3', 5'-GTC ACT GGA TCC TCA GTC TAA AGG TTG TGG G-3'	The CDS of MH2 domain (322-552aa) of Smad4 was PCR-amplified using IMAGE clone 2961238 (GenBank Accession No: BC002379.2) as the template. The resulting PCR product was subsequently digested by EcoRI/BamHI and ligated into pGEB vector using the same sites.
GST-Smad4-linker-MH2	pGEB	EcoRI/BamHI	5'-GTC ACT GAA TTC CTG GAA TTG ATC TCT CAG G-3'; 5'-GTC ACT GGA TCC TCA GTC TAA AGG TTG TGG G-3'	The CDS comprising the linker region and MH2 domain of Smad4 (140-552aa) was PCR-amplified using IMAGE clone 2961238 (GenBank Accession No: BC002379.2) as the template. The resulting PCR product was subseuqnelty digested by EcoRI/BamHI and ligated into pGEB vector using the same sites
HA-Smad4-MH2	pDHA-neo	EcoRI/SalI	5’-GTC ACT GAA TTC AAG TAG GAC TGC ACC ATA CAC-3', 5'-GTC ACT GTC GAC TCA GTC TAA AGG TTG TGG G-3'	The CDS of MH2 domain (270-552aa including SAD and MH2 domain) of Smad4 was PCR-amplified using IMAGE clone 2961238 (GenBank Accession No: BC002379.2) as the template. The resulting PCR product was subsequently digested by EcoRI/SalI and ligated into pDHA-neo vector using the same sites.
Myc-Smad4	pMyc-C1	BamHI/SacI		The CDS of Smad4 was released by digesting GFP-Smad4 using BamHI/SacI. The resulting fragment was subsequently ligated into pMyc-C1 vector using the same sites.
mCherry-Smad4	pmCherry-C1 (Clontech)	EcoRI/BamHI	5’-GAT GCA GAA TTC TGA CAA TAT GTC TAT TAC G-3’, 5’-GAT GCA GGA TCC TCA GTC TAA AGG TTG TGG-3’	The CDS of the full length Smad4 was PCR-amplified using Myc-Smad4 as the template. The resulting PCR product was digested by EcoRI/BamHI and ligated into pmCherry-C1 vector using the same sites.
mCherry-Smad4-MH2	pmCherry-C1 (Clontech)	EcoRI/BamHI	5’- GAT GCA GAA TTC TCC TGA GTA TTG GTG TTC C-3’, 5’- GAT GCA GGA TCC TCA ATG AAG TAC TTC GTC TAG-3’	The CDS of the MH2 domain (319-541aa) of Smad4 was PCR-amplified using Myc-Smad4 as the template. The resulting PCR product was digested by EcoRI/BamHI and ligated into pmCherry-C1 vector using the same sites. Note that the C-terminal 11 amino acids are truncated in this clone.
His-Smad4	pET-30ax	EcoRI/BamHI		The CDS of Smad4 was released by digesting pGEB-Smad4 using EcoRI/BamHI. The resulting fragment was subsequently ligated into pET30ax vector using the same sites.
GFP-Smad4-M447K	pEGFP-C1	EcoRI/BamHI	5'- AGC TCT GAA TTC TAT GGA CAA TAT GTC TAT TAC G -3'; 5'-CAT CGA CAG AAA CAG CAG CAG ; 5'- CTG CTG CTG TTT CTG TCG ATG-3'; 5'- AGC TCT GGA TCC TCA GTC TAA AGG TTG TGG G -3'	Two PCR amplifications were performed using GFP-Smad4 as the template and the first/second and third/fourth primer pair, respectively. The two PCR fragments were subseuqenlty mixed and subjected to the second round of PCR amplification using the first/fourth primer pair. The resulting PCR product was digested by EcoRI/BamHI and ligated into pEGFP-C1 vector using the same sites.
GFP-Smad4-D493H	pEGFP-C1	EcoRI/BamHI	5'- AGC TCT GAA TTC TAT GGA CAA TAT GTC TAT TAC G -3'; 5'-ATT GGT GTT CAC GAC CTT CGT-3'; 5'-ACG AAG GTC GTG AAC ACC AAT-3'; 5'- AGC TCT GGA TCC TCA GTC TAA AGG TTG TGG G -3'	Two PCR amplifications were performed using GFP-Smad4 as the template and the first/second and third/fourth primer pair, respectively. The two PCR fragments were subseuqenlty mixed and subjected to the second round of PCR amplification using the first/fourth primer pair. The resulting PCR product was digested by EcoRI/BamHI and ligated into pEGFP-C1 vector using the same sites.
GFP-Smad4-L495P	pEGFP-C1	EcoRI/BamHI	5'- AGC TCT GAA TTC TAT GGA CAA TAT GTC TAT TAC G -3'; 5'-GTT GAT GAC CCC CGT CGC TTAT-3'; 5'-ATA AGC GAC GGG GGT CAT CAA C-3'; 5'- AGC TCT GGA TCC TCA GTC TAA AGG TTG TGG G -3'	Two PCR amplifications were performed using GFP-Smad4 as the template and the first/second and third/fourth primer pair, respectively. The two PCR fragments were subseuqenlty mixed and subjected to the second round of PCR amplification using the first/fourth primer pair. The resulting PCR product was digested by EcoRI/BamHI and ligated into pEGFP-C1 vector using the same sites.
GFP-Smad4-R496H	pEGFP-C1	EcoRI/BamHI	5'- AGC TCT GAA TTC TAT GGA CAA TAT GTC TAT TAC G -3'; 5'-GAT GAC CTT CAC CGC TTA TGC A-3'; 5'-TGC ATA AGC GGT GAA GGT CAT C-3'; 5'- AGC TCT GGA TCC TCA GTC TAA AGG TTG TGG G -4'	Two PCR amplifications were performed using GFP-Smad4 as the template and the first/second and third/fourth primer pair, respectively. The two PCR fragments were subseuqenlty mixed and subjected to the second round of PCR amplification using the first/fourth primer pair. The resulting PCR product was digested by EcoRI/BamHI and ligated into pEGFP-C1 vector using the same sites.
GFP-Smad4-R497H	pEGFP-C1	EcoRI/BamHI	5'- AGC TCT GAA TTC TAT GGA CAA TAT GTC TAT TAC G -3'; 5'-GAT GAC CTT CGT CAC TTA TGC A-3'; 5'-TGC ATA AGT GAC GAA GGT CAT C-3'; 5'- AGC TCT GGA TCC TCA GTC TAA AGG TTG TGG G -5'	Two PCR amplifications were performed using GFP-Smad4 as the template and the first/second and third/fourth primer pair, respectively. The two PCR fragments were subseuqenlty mixed and subjected to the second round of PCR amplification using the first/fourth primer pair. The resulting PCR product was digested by EcoRI/BamHI and ligated into pEGFP-C1 vector using the same sites.
GFP-Smad4-A532D	pEGFP-C1	EcoRI/BamHI	5'- AGC TCT GAA TTC TAT GGA CAA TAT GTC TAT TAC G -3'; 5'-TTA CAC CGG GAT CTC CAG CTC-3'; 5'-GAG CTG GAG ATC CCG GTG TAA-3'; 5'- AGC TCT GGA TCC TCA GTC TAA AGG TTG TGG G -6'	Two PCR amplifications were performed using GFP-Smad4 as the template and the first/second and third/fourth primer pair, respectively. The two PCR fragments were subseuqenlty mixed and subjected to the second round of PCR amplification using the first/fourth primer pair. The resulting PCR product was digested by EcoRI/BamHI and ligated into pEGFP-C1 vector using the same sites.
GFP-Smad4-E538K	pEGFP-C1	EcoRI/BamHI	5'- AGC TCT GAA TTC TAT GGA CAA TAT GTC TAT TAC G -3'; 5'-CTC CTA GAC AAA GTA CTT CAT-3'; 5'-ATG AAG TAC TTT GTC TAG GAG-3'; 5'- AGC TCT GGA TCC TCA GTC TAA AGG TTG TGG G -7'	Two PCR amplifications were performed using GFP-Smad4 as the template and the first/second and third/fourth primer pair, respectively. The two PCR fragments were subseuqenlty mixed and subjected to the second round of PCR amplification using the first/fourth primer pair. The resulting PCR product was digested by EcoRI/BamHI and ligated into pEGFP-C1 vector using the same sites.
GFP-Smad4-H541Y	pEGFP-C1	EcoRI/BamHI	5'- AGC TCT GAA TTC TAT GGA CAA TAT GTC TAT TAC G -3'; 5'-GAA GTA CTTT ACA CCA TGC CG-3'; 5'-CGG CATG GTG TAA AGT ACT TC-3'; 5'- AGC TCT GGA TCC TCA GTC TAA AGG TTG TGG G -8'	Two PCR amplifications were performed using GFP-Smad4 as the template and the first/second and third/fourth primer pair, respectively. The two PCR fragments were subseuqenlty mixed and subjected to the second round of PCR amplification using the first/fourth primer pair. The resulting PCR product was digested by EcoRI/BamHI and ligated into pEGFP-C1 vector using the same sites.
GFP-Smad2	pEGFP-C1 (Clontech)	BamHI/KpnI	5'-AGC TCT GAA TTC TAT GTC GTC CAT CTT GCC ATT-3', 5'- AGC TCT GGT ACC TTA TGA CAT GCT TGA GCA ACG-3'	The CDS of human Smad2 was PCR-amplified using IMAGE clone 5221801 (GenBank Accession No.: BC025699) as the template. The resulting PCR product was subsequently digested by BamHI/KpnI and ligated into pGEB vector using the same sites.
GFP-Smad2-SA	pEGFP-C1 (Clontech)	EcoRI/KpnI	5'-AGC TCT GAA TTC TAT GTC GTC CAT CTT GCC ATT-3'; 5'-AGC TCT GGT ACC TTA AGC CAT TGC TGA GCA ACG CAC TGA AGG G-3'	The CDS of Smad2 was PCR-amplified using IMAGE clone 5221801 (GenBank Accession No.: BC025699) as the template. The resulting PCR product was subsequently digested by EcoRI/KpnI and ligated into pGEB vector using the same sites. The construct contains S465A and S467A mutations.
GFP-Smad2-SE	pEGFP-C1 (Clontech)	EcoRI/KpnI	5'-AGC TCT GAA TTC TAT GTC GTC CAT CTT GCC ATT-3'; 5'-AGC TCT GGT ACC TTA CTC CAT TTC TGA GCA ACG CAC TGA AGG G-3'	The CDS of Smad2 was PCR-amplified using MAGE clone 5221801 (GenBank Accession No.: BC025699) as the template. The resulting PCR product was subsequently digested by EcoRI/KpnI and ligated into pGEB vector using the same sites. The construct contains S465E and S467E mutations.
His-Smad2-SE	pET30a	EcoRI/XhoI	5'- AGC TCT GAA TTC TAT GTC GTC CAT CTT GCC ATT -3'; 5'-AGC TCT CTC GAG TTA CTC CAT TTC TGA GCA ACG CAC TGA AGG G-3'	The CDS of Smad2-SE was PCR-amplified using IMAGE clone 5221801 (GenBank Accession No.: BC025699) as the template. The resulting PCR product was digested by EcoRI/XhoI and ligated into pET30a vector using the same sites
GST-Smad2-MH2	pGEB	EcoRI/BamHI	5'- AGC TCT GAA TTC GTT ACT TAC TCA GAA CCT GC -3'; 5'- AGC TCT GGA TCC TTA CAT CTG AGT TAA TAC TTT GTC -3'	The CDS of Smad2 MH2 domain (266-456aa) was PCR-amplified using IMAGE clone 5221801 (GenBank Accession No.: BC025699) as the template. The resulting PCR product was digested by EcoRI/BamHI and ligated into pGEB vector using the same sites.
Myc-Smad2-MH2	pDMyc-neo	EcoRI/SalI	5'-GTC ACT GAA TTC AAT GGA CAC AGG CTC TCC AG-3'; 5'- AGC TCT GTC GAC TTA CAT CTG AGT TAA TAC TTT GTC-3'	The CDS of Smad2 MH2 domain (242-456aa) was PCR-amplified using IMAGE clone 5221801 (GenBank Accession No.: BC025699) as the template. The resulting PCR product was digested by EcoRI/SalI and ligated into pDMyc-neo vector using the same sites.
GST-Smad2-MH1	pGEB	EcoRI/BamHI	5'-GTC ACT GAA TTC ATG TCG TCC ATC TTG CCA TTC-3'; 5'- AGC TCT GGA TCC CTC GGT GTG TCG GGG CAC-3'	The CDS of Smad2 MH1 domain (1-185aa) was PCR-amplified using IMAGE clone 5221801 (GenBank Accession No.: BC025699) as the template. The resulting PCR product was digested by EcoRI/BamHI and ligated into pGEB vector using the same sites.
GFP-Smad1	pEGFP-C1 (Clontech)	SalI/BamHI	5'-AGT CTA GTC GAC AAT GTG ACA AGT TTA TTT TCC-3'; 5'-AGA CTA GGA TCC TTA AGA TAC AGA TGA AAT AGG-3'	The CDS of Smad1 was PCR-amplified using pRK5F-FLAG-Smad1 (Addgene #12622) as the template. The resulting PCR product was digested by SalI/BamHI and ligated into pEGFP-C1 vector using the same sites.
GFP-Smad1-SA	pEGFP-C1 (Clontech)	SalI/BamHI	5'-AGT CTA GTC GAC AAT GTG ACA AGT TTA TTT TCC-3' ; 5'-AGA CTA GGA TCC TTA TGC TAC TGC TGA AAT AGG-3'	The CDS of Smad1-SA was PCR-amplified using pRK5F-FLAG-Smad1(Addgene #12622) as the template. The resulting PCR product was digested by SalI/BamHI and ligated into pEGFP-C1 vector using the same sites.
GFP-Smad1-SE	pEGFP-C1 (Clontech)	SalI/BamHI	5'-AGT CTA GTC GAC AAT GTG ACA AGT TTA TTT TCC-3'; 5'-AGA CTA GGA TCC TTA CTC TAC CTC TGA AAT AGG-3'	The CDS of Smad1-SE was PCR-amplified using pRK5F-FLAG-Smad1(Addgene #12622) as the template. The resulting PCR product was digested by SalI/BamHI and ligated into pEGFP-C1 vector using the same sites.
GST-Smad1-MH2	pGEX-KG (GE Healthcare)	BamHI/HindIII	5'-GTC ACT GGA TCC TAT GAG GAA CCA AAA CAC TG-3'; 5'-GTC ACT AAG CTT TTA AGA TAC AGA TGA AAT AGG-3'	The CDS of Smad1 MH2 domain (265-465aa) was PCR amplified using Flag-Smad1 as the template. The resulting PCR product was digested by BamHI/HindIII and ligated into pGEX-KG vector using the same sites.
GST-Smad3				Addgene #12630; a gift from R. Derynck.
GST-Smad3-MH2				Addgene #12634; a gift from R. Derynck.
GST-Smad3-linker MH2				Addgene #12633; a gift from R. Derynck.
Flag-Smad1				Addgene #12622; a gift from R. Derynck.
other constructs
name	vector (source)	cloning sites	primers	brief method or source reference
SBEx4-Luc	pGL3-promoter (Promega)	KpnI/XhoI	5'-CGT CTA GAC ATC AGT CTA GAC GTT CGT CTA GAC AAG CGT CTA GAC C-3'; 5'-TCG AGG TCT AGA CGC TTG TCT AGA CGA ACG TCT AGA CTG ATG TCT AGA CGG TAC-3'.	The two oligonucleotides were annealed and ligated into KpnI/XhoI digested pGL3-promoter vector.
BRE-Luc				Addgene #45126; a gift from M. Roussel & P. ten Dijke.
mCherry-CAAX				It was described in Lu et al., 2009.
Lamp1-mCherry				It was described in Shi et al., 2018.
Lamp1-GFP				A gift from T. Kirchahausen.
mCherry-Rab5				A gift from T. Kirchahausen.
mCherry-Rab7				It was described in Mahajan et al., 2019.
GFP-Rab7				A gift from T. Kirchahausen.
TfR-GFP				A gift from T. Kirchahausen.
GFP-3XFYVE				A gift from T. Kirchahausen.
GFP-Golgin84				A gift from M. Lowe.
Myc-SNX3				A gift from W. Hong (Lu and Hong, 2003).
Ii-Strep_ManII-SBP-GFP				A gift from F.Perez (Boncompain et al., 2012).
Ii-Strep_TNFα-SBP-GFP				A gift from F.Perez (Boncompain et al., 2012).
GFP-DEN(W34A)				It was described in Mahajan et al., 2019.
pMD2.G				Addgene #12259; a figt from D. Trono.
psPAX2				Addgene #12260; a figt from D. Trono.
Arl5b-WT-GFP				It was described in Shi et al., 2018.
Arl5b-Q70L-GFP				It was described in Shi et al., 2018.
Arl5b-T30N-GFP				It was described in Shi et al., 2018.
GL2-shRNA				It was described in Shi et al., 2018.
Supplementary References
Boncompain, G., Divoux, S., Gareil, N., de Forges, H., Lescure, A., Latreche, L., Mercanti, V., Jollivet, F., Raposo, G. and Perez, F. 2012. Synchronization of secretory protein traffic in populations of cells. Nat Methods. 9:493–498.
Lu, L., Ladinsky, M.S. and Kirchhausen, T. 2009. Cisternal organization of the endoplasmic reticulum during mitosis. Mol. Biol. Cell 20:3471-3480.
Lu, L., and Hong, W. 2003. Interaction of Arl1-GTP with GRIP domains recruits autoantigens Golgin-97 and Golgin-245/p230 onto the Golgi. Mol. Biol. Cell 14:3767-3781.
Mahajan, D., B.K. Boh, Y. Zhou, L. Chen, T.C. Cornvik, W. Hong, and L. Lu. 2013. Mammalian Mon2/Ysl2 regulates endosome-to-Golgi trafficking but possesses no guanine nucleotide exchange activity toward Arl1 GTPase. Sci Rep. 3:3362.
Mahajan, D., Tie, H.C., Chen, B. and Lu, L. 2019. Dopey1-Mon2 complex binds to dual-lipids and recruits kinesin-1 for membrane trafficking. Nat. Commun.10:3218.
Madugula, V. and Lu, L. 2016. A ternary complex comprising transportin1, Rab8 and the ciliary targeting signal directs proteins to ciliary membranes. J. Cell Sci. 129:3922-3934.
Shi, M., Chen, B., Mahajan, D., Boh, B.K., Zhou, Y., Dutta, B., Tie, H.C., Sze, S.K., Wu, G. and Lu, L. 2018. Amino acids stimulate the endosome-to-Golgi trafficking through Ragulator and small GTPase Arl5. Nat. Commun. 9:4987.
